# Supplementary material for: Degradation of Recalcitrant Polyurethane and Xenobiotic Additives by a Selected Landfill Microbial Community and Its Biodegradative Potential Revealed by Proximity Ligation-Based Metagenomic Analysis
Source: PubMed Central journal article supplement (PMC6987047; doi:10.3389/fmicb.2019.02986), 2020-01-22
Supplement: Data_Sheet_1.pdf [file Data_Sheet_1.pdf]

**Supplementary Table S1. PolyLack additives consumption during cultivation of BP8 community.**

| *Additive (%)                      | Non-inoculated | Culture time (days) |      |      |      |      |      |      |    |
|------------------------------------|----------------|---------------------|------|------|------|------|------|------|----|
|                                    |                | 1                   | 2    | 3    | 4    | 5    | 10   | 15   | 20 |
| 1. 2-butoxyethanol                 | 100            | 22.0                | 19.2 | 7.5  | 3.5  | 0    | 0    | 0    | 0  |
| 2. Dipropylene glycol methyl ether | 100            | 16.1                | 14.1 | 15.0 | 15.5 | 17.6 | 16.0 | 16.1 | 16 |
| 3. N-methyl-2-pyrrolidone          | 100            | 0                   | 0    | 0    | 0    | 0    | 0    | 0    | 0  |
| 4. Dipropylene glycol butyl ether  | 100            | 27.2                | 26.5 | 27.7 | 26.1 | 26.3 | 28   | 27.1 | 30 |

\*Standard curves set with pure compounds were used for quantification of additives. Additives concentration in non-inoculated samples of MM-PolyLack was considered 100%. Numbers of the compounds represent the peaks in the chromatograms shown in Supplementary Figure S1.

**Supplementary Table S2. Biodegradation products identified during the cultivation of the BP8 community in MM-Polylack.**

| *Biodegradation products (area)               | Culture time (days) |        |        |        |        |        |        |        |        |
|-----------------------------------------------|---------------------|--------|--------|--------|--------|--------|--------|--------|--------|
|                                               | Non-inoculated      | 1      | 2      | 3      | 4      | 5      | 10     | 15     | 20     |
| <b>Aromatics</b>                              |                     |        |        |        |        |        |        |        |        |
| 5. 2,4-Toluene diisocyanate derivative        | 396284              | 210323 | 330578 | 299568 | 207044 | 356398 | 331245 | 217019 | 249605 |
| 6. Methylene diphenyl diisocyanate derivative | 287793              | 220793 | 54595  | 50936  | 55191  | 108873 | 136280 | 131777 | 116545 |
| 7. 3,5-Di- <i>tert</i> -butylphenol           | 0                   | 0      | 0      | 35787  | 12051  | 58975  | 415594 | 140426 | 130889 |
| 8. 2-Benzyl-5-oxocyclohexanecarboxylic acid   | 0                   | 0      | 22217  | 27656  | 26630  | 46695  | 68912  | 31559  | 47082  |
| 9. $\alpha$ -2-Propenylbenzeneacetaldehyde    | 0                   | 0      | 16897  | 35787  | 50086  | 46693  | 305653 | 116986 | 269677 |
| 10. 4-Methylcinnamic acid ester               | 0                   | 0      | 0      | 47059  | 50393  | 72610  | 183476 | 76501  | 70074  |
| <b>Nitrogen containing</b>                    |                     |        |        |        |        |        |        |        |        |
| 11. <i>N,N</i> -Diethylhydroxylamine          | 0                   | 8231   | 5146   | 8267   | 5177   | 18239  | 3494   | 18216  | 15901  |
| 12. 2-Hydroxybutanoic acid hydrazide          | 0                   | 0      | 0      | 4802   | 0      | 8007   | 49400  | 15322  | 13816  |
| 13. Stearic acid hydrazide                    | 0                   | 0      | 0      | 13367  | 8932   | 0      | 0      | 23822  | 9188   |
| 14. <i>O</i> -Decylhydroxylamine              | 0                   | 0      | 0      | 0      | 28876  | 62425  | 302484 | 78756  | 73626  |
| <b>Ethers</b>                                 |                     |        |        |        |        |        |        |        |        |
| 15. Propylene glycol butyl ether              | 0                   | 35235  | 91892  | 79984  | 55877  | 70096  | 274909 | 58458  | 357803 |
| 16. 1,2,3-Propanetriol, 1-indol-4-yl- ether   | 0                   | 0      | 0      | 23665  | 17955  | 19367  | 195926 | 59607  | 67136  |
| 17. Oxalic acid di- <i>sec</i> -butyl ester   | 0                   | 0      | 27629  | 52302  | 49504  | 73678  | 186661 | 33920  | 47228  |
| 18. 1-Ethyldecyl acetate                      | 0                   | 16872  | 15161  | 15074  | 18018  | 31218  | 134304 | 66141  | 33494  |
| 19. Tetrahydrolinalyl acetate                 | 0                   | 13580  | 21962  | 16917  | 18859  | 30560  | 138363 | 47297  | 30864  |
| 20. 1-Methyldodecyl acetate                   | 0                   | 24505  | 29517  | 21388  | 22637  | 71030  | 271827 | 154162 | 150944 |
| 21. 2-Ethylundecyl acetate                    | 0                   | 29597  | 34345  | 28447  | 50883  | 115466 | 274808 | 168235 | 172285 |
| 22. 2-Palmityl acetate                        | 0                   | 0      | 0      | 0      | 124898 | 254356 | 419171 | 264126 | 173680 |
| 23. 1-Ethyltridecyl acetate                   | 0                   | 16932  | 0      | 14688  | 22987  | 16672  | 183159 | 61590  | 45659  |
| 24. Lauric acid methyl ester                  | 0                   | 15982  | 0      | 0      | 0      | 42782  | 216994 | 47712  | 2583   |
| <b>Aliphatics</b>                             |                     |        |        |        |        |        |        |        |        |
| 25. 2,4-Dimethyl-1-heptene                    | 80333               | 12324  | 41466  | 23238  | 20216  | 34279  | 108717 | 43372  | 44517  |
| 26. 2,6,10-Trimethyltetradecane               | 0                   | 0      | 0      | 14594  | 146501 | 48409  | 136754 | 37755  | 48979  |
| <b>Alcohols</b>                               |                     |        |        |        |        |        |        |        |        |
| 27. 4-Hexadecanol                             | 0                   | 17016  | 26631  | 27332  | 12921  | 72491  | 228358 | 186127 | 134788 |
| 28. 2-Hexyl-1-decanol                         | 0                   | 15798  | 11251  | 10553  | 15751  | 37688  | 185452 | 68618  | 35932  |
| <b>Organic acids</b>                          |                     |        |        |        |        |        |        |        |        |
| 29. 3-Hydroxy-3-methylbutyric acid            | 0                   | 0      | 0      | 10184  | 12020  | 4998   | 65496  | 35579  | 14114  |

\*Numbers of the compounds represent the peaks in the chromatograms shown in Supplementary Figure S1.

**Supplementary Table S3. Effects of BP8 biodegradative activity on the PE-PU-A copolymer analyzed by Differential Scanning Calorimetry.**

| <b>Culture time (days)</b> | <b>Tg (°C)</b> | <b>Tm-I (°C)</b> | <b>Tm-II (°C)</b> | <b>Tm-III (°C)</b> | <b>Tc (°C)</b> |
|----------------------------|----------------|------------------|-------------------|--------------------|----------------|
| Non-inoculated             | 50.2           | 70.0             | 210.6             | 398.1              | 459.6          |
| 5                          | 39.5           | 68.8             | 211.0             | 408.7              | 478.2          |
| 10                         | 46.0           | 68.0             | 210.1             | 407.9              | 480.2          |
| 15                         | 38.1           | 70.5             | 211.1             | 393.2              | 479.9          |
| 20                         | 46.2           | 78.8             | 213.9             | 392.5              | 476.2          |

Tg = glass transition temperature; Tm = melting temperature; Tc = crystallization temperature.

**Supplementary Table S4. <sup>a</sup>Phylogenetic relatedness of the bacterial species from the BP8 community identified by Hi-C metagenome deconvolution.**

| Clusters/<br>Classification/<br>GeneBank Acc.<br>Num.                            | Organism                                    | Assembly        | Genome<br>size<br>(Mb) | GC<br>content<br>(%) | <sup>a</sup> ANI<br>value<br>(%) | Proteins<br>encoded<br>in the<br>genomes |
|----------------------------------------------------------------------------------|---------------------------------------------|-----------------|------------------------|----------------------|----------------------------------|------------------------------------------|
| Cluster 1/<br><i>Paracoccus</i> sp.<br>BP8<br>GCA_003852815.1                    | <i>Paracoccus</i> sp. J39                   | GCA_000518925.1 | 4.42837                | 68.08                | 98.73                            | 4131-4993                                |
|                                                                                  | <i>Paracoccus denitrificans</i>             | GCA_000203895.1 | 5.23619                | 66.78                | 90.24                            |                                          |
|                                                                                  | <i>Paracoccus aminovorans</i>               | GCA_001546115.1 | 4.58940                | 67.50                | 85.59                            |                                          |
|                                                                                  | <i>Paracoccus halophilus</i>                | GCA_900111785.1 | 4.00871                | 65.20                | 82.17                            |                                          |
|                                                                                  | <i>Paracoccus yeei</i>                      | GCA_002073635.2 | 4.82967                | 67.08                | 81.95                            |                                          |
| Cluster 2/<br><i>Chryseobacterium</i><br>sp. BP8.2<br>GCA_003852805.1            | <i>Chryseobacterium koreense</i>            | GCA_001045435.1 | 3.15420                | 40.10                | 69.38                            | 3000-4810                                |
|                                                                                  | <i>Chryseobacterium camelliae</i>           | GCA_002770595.1 | 4.37635                | 41.80                | 68.86                            |                                          |
|                                                                                  | <i>Chryseobacterium luteum</i>              | GCA_000737785.1 | 4.71855                | 37.30                | 68.70                            |                                          |
|                                                                                  | <i>Chryseobacterium</i> sp. 52              | GCA_002754245.1 | 5.29882                | 37.00                | 68.49                            |                                          |
| Cluster 3/<br><i>Parapedobacter</i><br>sp. BP8.3<br>GCA_003852785.1              | <i>Chryseobacterium antarcticum</i>         | GCA_000729985.1 | 3.12366                | 36.10                | 68.10                            | 3796-4949                                |
|                                                                                  | <i>Parapedobacter indicus</i>               | GCA_900113765.1 | 6.15523                | 48.00                | 80.23                            |                                          |
|                                                                                  | <i>Parapedobacter koreensis</i>             | GCA_900109365.1 | 5.54776                | 48.20                | 74.24                            |                                          |
|                                                                                  | <i>Parapedobacter luteus</i>                | GCA_900168055.1 | 4.82992                | 49.30                | 73.66                            |                                          |
| Cluster 4/<br>Microbacteriaceae<br>bacterium BP8.4<br>GCA_003852775.1            | <i>Parapedobacter composti</i>              | GCA_900112315.1 | 4.62202                | 50.00                | 73.32                            | 2535-3047                                |
|                                                                                  | <i>Micrococcales bacterium</i> 72-143       | GCA_001898835.1 | 3.33048                | 71.60                | 85.07                            |                                          |
|                                                                                  | <sup>b</sup> <i>Leifsonia</i> sp. Leaf336   | GCA_001423695.1 | 4.15779                | 69.60                | 74.40                            |                                          |
|                                                                                  | <sup>b</sup> <i>Microcella alkaliphila</i>  | GCA_002355395.1 | 2.70284                | 68.40                | 74.10                            |                                          |
|                                                                                  | <sup>b</sup> <i>Plantibacter</i> sp. H53    | GCA_001650455.1 | 4.01278                | 69.40                | 73.98                            |                                          |
| Cluster 5/<br><i>Ochrobactrum</i><br><i>intermedium</i> BP8.5<br>GCA_003852825.1 | <sup>b</sup> <i>Herbiconiux</i> sp. YR403   | GCA_000799285.1 | 3.60404                | 62.00                | 71.66                            | 3645-4502                                |
|                                                                                  | <sup>c</sup> <i>Arthrobacter cupressi</i>   | GCA_900099975.1 | 4.0588                 | 67.00                | 70.82                            |                                          |
|                                                                                  | <i>Ochrobactrum intermedium</i><br>LMG 3301 | GCA_000182645.1 | 4.72539                | 57.70                | 98.48                            |                                          |
|                                                                                  | <i>Ochrobactrum anthropi</i>                | GCA_000017405.1 | 5.20578                | 56.15                | 87.48                            |                                          |
|                                                                                  | <i>Ochrobactrum oryzae</i> OA447            | GCA_002943495.1 | 4.46700                | 56.20                | 87.19                            |                                          |
|                                                                                  | <i>Brucella ceti</i>                        | GCA_000590795.1 | 3.27803                | 57.27                | 82.03                            |                                          |
|                                                                                  | <i>Ochrobactrum</i> sp. P6BS-III            | GCA_002016635.1 | 5.25313                | 56.00                | 81.19                            |                                          |

<sup>a</sup> Phylogenetic relatedness was calculated based on ANI value with OrthoANLu algorithm. ANI values higher than 95% indicate that the compared genomes are the same species (Yoon S-H, Ha S, Lim J, Kwon S, Chun J. A large-scale evaluation of algorithms to calculate average nucleotide identity. *Antonie Van Leeuwenhoek*. 2017; 110:1281-6).

<sup>b</sup> Members of *Microbacteriaceae* family, order Micrococcales.

<sup>c</sup> Member of *Micrococccaceae* family, order Micrococcales.
